# Supplementary material
Source: publisher site journal article supplement (https://www.dovepress.com/get_supplementary_file.php?f=278103.docx)
Supplement: Supplementary file 1 [file get_supplementary_file.php]

**Supplementary materials**

**Table S1** SiRNA sequences used in the study

| siRNA | Sense (5′-3′) | Antisense (5′-3′) |
| --- | --- | --- |
| siGFP | GGCACAAGCUGGAGUACAATT | UUGUACUCCAGCUUGUGCCTT |
| siWWP1 | CCAUGGAAUCUGUCCGAAATT | UUUCGGACAGAUUCCAUGGTT |
| siNC | UUCUCCGAACGUGUCACGUTT | ACGUGACACGUUCGGAGAATT |

**Abbreviations:** siGFP, siRNA-targeting green fluorescent protein; siWWP1, siRNA-targeting WW domain-containing E3 ubiquitinprotein ligase 1; siNC, negative control siRNA


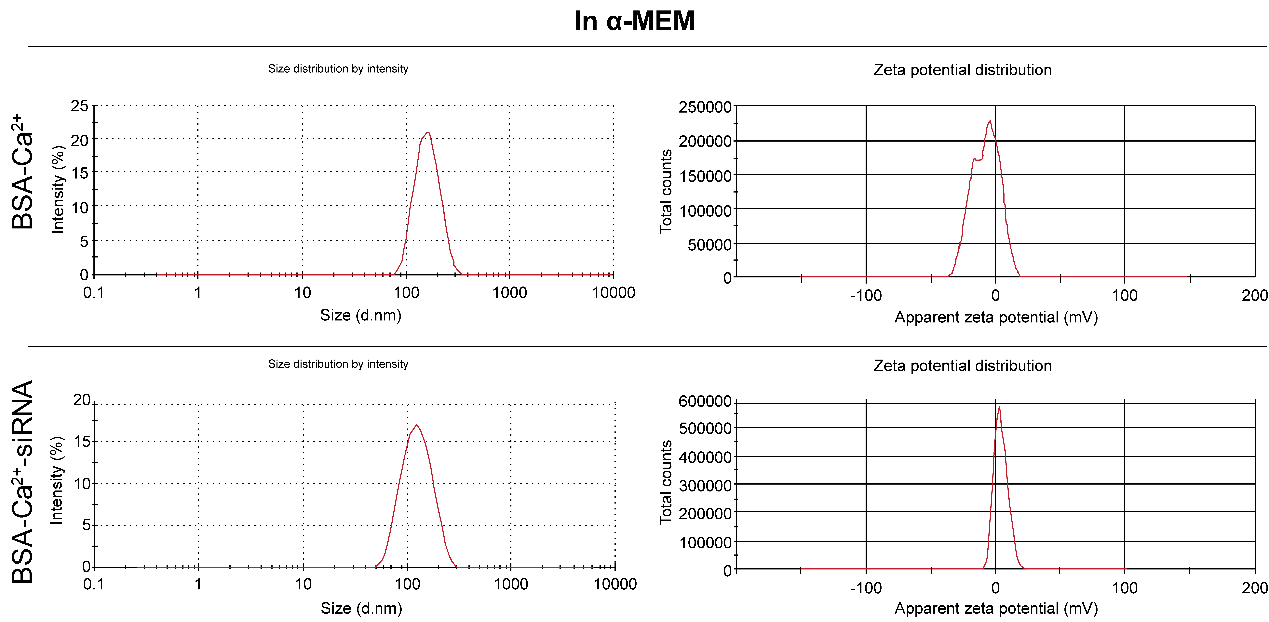


**Figure S1** Dynamic light scattering and Zeta potential analysis of complexes





**Figure S2** Gel electrophoresis of Ca-siRNA processed at various Ca concentrations (0.5–2.0 M)


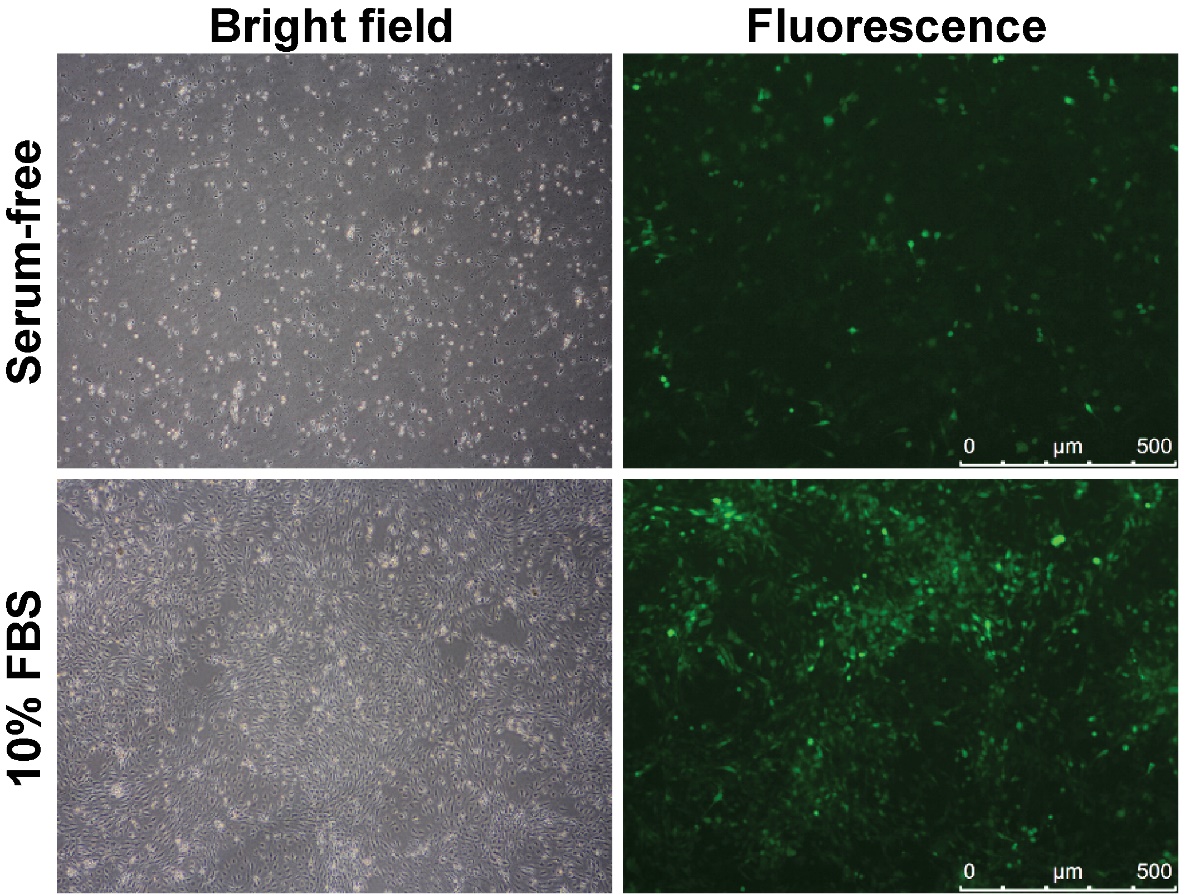


**Figure S3** Effect of transfection solution with or without 10% fetal bovine serum (FBS) on cell transfection, as evaluated by fluorescence microscopy
